# Supplementary material for: Genomic and phenotypic biology of a novel Dickeya zeae WH1 isolated from rice in China: Insights into pathogenicity and virulence factors
Source: Front Microbiol. 2022 Oct 28;13:997486. doi: 10.3389/fmicb.2022.997486 (PMC9650423; doi:10.3389/fmicb.2022.997486)
Supplement: Supplementary file 3 [file Table_2.XLSX]

## Sheet: Sheet1
Supplementary Table 2| Unique Gene clusters in genome of D. zeae EC1.
Locus tag	Function
W909_RS07075	(2Fe-2S)-binding protein
W909_RS06845	4-hydroxy-2-oxovalerate aldolase
W909_RS12710	7-cyano-7-deazaguanine synthase
W909_RS00520	AAA family ATPase
W909_RS07840	AAA family ATPase
W909_RS12300	AAA family ATPase
W909_RS14130	AAA family ATPase
W909_RS19255	AAA family ATPase
W909_RS06840	acetaldehyde dehydrogenase (acetylating)
W909_RS20615	acid resistance repetitive basic protein Asr
W909_RS02025	AlpA family phage regulatory protein
W909_RS06555	alpha/beta fold hydrolase
W909_RS09445	alpha/beta hydrolase
W909_RS06520	amidohydrolase
W909_RS08375	amidohydrolase
W909_RS06850	amino acid adenylation domain-containing protein
W909_RS15985	anticodon nuclease
W909_RS13500	antitoxin
W909_RS06885	AraC family transcriptional regulator
W909_RS08735	baseplate J/gp47 family protein
W909_RS15870	beta-glucoside-specific PTS transporter subunit IIABC
W909_RS06855	chlorinating enzyme
W909_RS08745	contractile injection system tape measure protein
W909_RS06870	cupin domain-containing protein
W909_RS02270	delta-endotoxin CytB
W909_RS02285	delta-endotoxin CytB
W909_RS06890	DUF2000 family protein
W909_RS10135	DUF3102 domain-containing protein
W909_RS20580	DUF4157 domain-containing protein
W909_RS08685	DUF4255 domain-containing protein
W909_RS08620	DUF4917 family protein
W909_RS10200	DUF935 domain-containing protein
W909_RS02080	dynamin family protein
W909_RS14055	FIST C-terminal domain-containing protein
W909_RS17250	FkbM family methyltransferase
W909_RS16830	glutamate-cysteine ligase family protein
W909_RS00505	GNAT family N-acetyltransferase
W909_RS08725	GPW/gp25 family protein
W909_RS03270	helix-turn-helix domain-containing protein
W909_RS12725	helix-turn-helix domain-containing protein
W909_RS02110	helix-turn-helix transcriptional regulator
W909_RS20985	HNH endonuclease
W909_RS17265	hydroxymethylglutaryl-CoA synthase family protein
W909_RS00510	hypothetical protein
W909_RS02020	hypothetical protein
W909_RS02085	hypothetical protein
W909_RS03280	hypothetical protein
W909_RS03355	hypothetical protein
W909_RS06180	hypothetical protein
W909_RS06290	hypothetical protein
W909_RS06310	hypothetical protein
W909_RS06880	hypothetical protein
W909_RS08625	hypothetical protein
W909_RS08730	hypothetical protein
W909_RS08740	hypothetical protein
W909_RS08750	hypothetical protein
W909_RS08755	hypothetical protein
W909_RS09730	hypothetical protein
W909_RS10160	hypothetical protein
W909_RS10195	hypothetical protein
W909_RS10220	hypothetical protein
W909_RS10355	hypothetical protein
W909_RS11080	hypothetical protein
W909_RS12235	hypothetical protein
W909_RS12240	hypothetical protein
W909_RS12245	hypothetical protein
W909_RS12255	hypothetical protein
W909_RS12705	hypothetical protein
W909_RS13490	hypothetical protein
W909_RS13555	hypothetical protein
W909_RS14135	hypothetical protein
W909_RS17215	hypothetical protein
W909_RS19260	hypothetical protein
W909_RS19765	hypothetical protein
W909_RS19795	hypothetical protein
W909_RS19815	hypothetical protein
W909_RS20650	hypothetical protein
W909_RS20715	hypothetical protein
W909_RS20720	hypothetical protein
W909_RS20835	hypothetical protein
W909_RS20840	hypothetical protein
W909_RS20860	hypothetical protein
W909_RS20875	hypothetical protein
W909_RS20925	hypothetical protein
W909_RS20965	hypothetical protein
W909_RS21005	hypothetical protein
W909_RS21010	hypothetical protein
W909_RS21015	hypothetical protein
W909_RS21020	hypothetical protein
W909_RS21035	hypothetical protein
W909_RS02030	inovirus Gp2 family protein
W909_RS02015	IS110 family transposase
W909_RS03680	IS110 family transposase
W909_RS06600	IS110 family transposase
W909_RS07140	IS110 family transposase
W909_RS18485	IS110 family transposase
W909_RS06865	LysE family transporter
W909_RS07090	MOSC domain-containing protein
W909_RS00875	MULTISPECIES: 2-dehydro-3-deoxy-6-phosphogalactonate aldolase
W909_RS20555	MULTISPECIES: 4\\'-phosphopantetheinyl transferase superfamily protein
W909_RS10125	MULTISPECIES: AAA family ATPase
W909_RS06480	MULTISPECIES: ABC transporter ATP-binding protein
W909_RS06545	MULTISPECIES: ABC transporter ATP-binding protein
W909_RS06550	MULTISPECIES: ABC transporter permease
W909_RS17185	MULTISPECIES: ACP S-malonyltransferase
W909_RS17190	MULTISPECIES: ACP S-malonyltransferase
W909_RS17225	MULTISPECIES: acyl carrier protein
W909_RS17255	MULTISPECIES: acyl carrier protein
W909_RS14210	MULTISPECIES: AlpA family phage regulatory protein
W909_RS02095	MULTISPECIES: antitoxin
W909_RS08760	MULTISPECIES: ATP-binding protein
W909_RS14060	MULTISPECIES: ATP-binding protein
W909_RS10295	MULTISPECIES: baseplate J/gp47 family protein
W909_RS05885	MULTISPECIES: cell envelope integrity protein TolA
W909_RS06540	MULTISPECIES: condensation domain-containing protein
W909_RS14160	MULTISPECIES: conjugal transfer protein TraJ
W909_RS10280	MULTISPECIES: contractile injection system protein, VgrG/Pvc8 family
W909_RS17220	MULTISPECIES: cupin-like domain-containing protein
W909_RS16825	MULTISPECIES: cysteine desulfurase
W909_RS10130	MULTISPECIES: DDE-type integrase/transposase/recombinase
W909_RS10090	MULTISPECIES: DNA-binding protein
W909_RS10145	MULTISPECIES: DNA-binding protein
W909_RS10230	MULTISPECIES: DUF1320 domain-containing protein
W909_RS10225	MULTISPECIES: DUF2190 family protein
W909_RS20145	MULTISPECIES: DUF2627 domain-containing protein
W909_RS18855	MULTISPECIES: DUF2756 domain-containing protein
W909_RS10190	MULTISPECIES: DUF3486 family protein
W909_RS20795	MULTISPECIES: DUF5908 family protein
W909_RS03365	MULTISPECIES: EamA family transporter
W909_RS20275	MULTISPECIES: EexN family lipoprotein
W909_RS17270	MULTISPECIES: enoyl-CoA hydratase/isomerase
W909_RS03390	MULTISPECIES: FAD-binding oxidoreductase
W909_RS10655	MULTISPECIES: FAD-dependent oxidoreductase
W909_RS15565	MULTISPECIES: FlxA-like family protein
W909_RS06485	MULTISPECIES: FtsX-like permease family protein
W909_RS16815	MULTISPECIES: gamma-glutamyl-gamma-aminobutyrate hydrolase family protein
W909_RS03385	MULTISPECIES: glycosyltransferase
W909_RS03395	MULTISPECIES: glycosyltransferase
W909_RS03380	MULTISPECIES: glycosyltransferase family 2 protein
W909_RS03425	MULTISPECIES: glycosyltransferase family 4 protein
W909_RS07820	MULTISPECIES: GNAT family N-acetyltransferase
W909_RS00880	MULTISPECIES: GntR family transcriptional regulator
W909_RS10235	MULTISPECIES: Gp37 family protein
W909_RS20820	MULTISPECIES: GpE family phage tail protein
W909_RS10290	MULTISPECIES: GPW/gp25 family protein
W909_RS14065	MULTISPECIES: HDOD domain-containing protein
W909_RS14205	MULTISPECIES: helicase RepA family protein
W909_RS07240	MULTISPECIES: helix-turn-helix domain-containing protein
W909_RS10140	MULTISPECIES: helix-turn-helix domain-containing protein
W909_RS10150	MULTISPECIES: helix-turn-helix domain-containing protein
W909_RS15965	MULTISPECIES: helix-turn-helix transcriptional regulator
W909_RS20790	MULTISPECIES: his operon leader peptide
W909_RS06475	MULTISPECIES: HlyD family efflux transporter periplasmic adaptor subunit
W909_RS10110	MULTISPECIES: host-nuclease inhibitor Gam family protein
W909_RS00765	MULTISPECIES: hypothetical protein
W909_RS03275	MULTISPECIES: hypothetical protein
W909_RS03290	MULTISPECIES: hypothetical protein
W909_RS03295	MULTISPECIES: hypothetical protein
W909_RS03305	MULTISPECIES: hypothetical protein
W909_RS03310	MULTISPECIES: hypothetical protein
W909_RS03330	MULTISPECIES: hypothetical protein
W909_RS03400	MULTISPECIES: hypothetical protein
W909_RS04215	MULTISPECIES: hypothetical protein
W909_RS04220	MULTISPECIES: hypothetical protein
W909_RS06325	MULTISPECIES: hypothetical protein
W909_RS06490	MULTISPECIES: hypothetical protein
W909_RS06500	MULTISPECIES: hypothetical protein
W909_RS07070	MULTISPECIES: hypothetical protein
W909_RS08710	MULTISPECIES: hypothetical protein
W909_RS08765	MULTISPECIES: hypothetical protein
W909_RS09680	MULTISPECIES: hypothetical protein
W909_RS10100	MULTISPECIES: hypothetical protein
W909_RS10105	MULTISPECIES: hypothetical protein
W909_RS10120	MULTISPECIES: hypothetical protein
W909_RS10155	MULTISPECIES: hypothetical protein
W909_RS10175	MULTISPECIES: hypothetical protein
W909_RS10180	MULTISPECIES: hypothetical protein
W909_RS10185	MULTISPECIES: hypothetical protein
W909_RS10215	MULTISPECIES: hypothetical protein
W909_RS10240	MULTISPECIES: hypothetical protein
W909_RS10260	MULTISPECIES: hypothetical protein
W909_RS12665	MULTISPECIES: hypothetical protein
W909_RS13020	MULTISPECIES: hypothetical protein
W909_RS13590	MULTISPECIES: hypothetical protein
W909_RS14140	MULTISPECIES: hypothetical protein
W909_RS14165	MULTISPECIES: hypothetical protein
W909_RS14170	MULTISPECIES: hypothetical protein
W909_RS14175	MULTISPECIES: hypothetical protein
W909_RS14185	MULTISPECIES: hypothetical protein
W909_RS14195	MULTISPECIES: hypothetical protein
W909_RS14200	MULTISPECIES: hypothetical protein
W909_RS16810	MULTISPECIES: hypothetical protein
W909_RS16820	MULTISPECIES: hypothetical protein
W909_RS17200	MULTISPECIES: hypothetical protein
W909_RS19825	MULTISPECIES: hypothetical protein
W909_RS19885	MULTISPECIES: hypothetical protein
W909_RS20155	MULTISPECIES: hypothetical protein
W909_RS20730	MULTISPECIES: hypothetical protein
W909_RS20740	MULTISPECIES: hypothetical protein
W909_RS20770	MULTISPECIES: hypothetical protein
W909_RS20785	MULTISPECIES: hypothetical protein
W909_RS20425	MULTISPECIES: ilv operon leader peptide
W909_RS20885	MULTISPECIES: ilvB operon leader peptide IvbL
W909_RS17235	MULTISPECIES: LLM class flavin-dependent oxidoreductase
W909_RS06805	MULTISPECIES: MFS transporter
W909_RS17245	MULTISPECIES: NAD(P)-binding domain-containing protein
W909_RS03375	MULTISPECIES: NAD(P)-dependent oxidoreductase
W909_RS06530	MULTISPECIES: non-ribosomal peptide synthetase
W909_RS00770	MULTISPECIES: O-antigen ligase family protein
W909_RS01875	MULTISPECIES: pesticin C-terminus-like muramidase
W909_RS06505	MULTISPECIES: PfaD family polyunsaturated fatty acid/polyketide biosynthesis protein
W909_RS17195	MULTISPECIES: PfaD family polyunsaturated fatty acid/polyketide biosynthesis protein
W909_RS10285	MULTISPECIES: phage baseplate assembly protein V
W909_RS10250	MULTISPECIES: phage major tail tube protein
W909_RS10205	MULTISPECIES: phage minor head protein
W909_RS10255	MULTISPECIES: phage tail assembly protein
W909_RS10300	MULTISPECIES: phage tail protein
W909_RS08695	MULTISPECIES: phage tail sheath subtilisin-like domain-containing protein
W909_RS10245	MULTISPECIES: phage tail sheath subtilisin-like domain-containing protein
W909_RS10265	MULTISPECIES: phage tail tape measure protein
W909_RS10210	MULTISPECIES: phage virion morphogenesis protein
W909_RS07085	MULTISPECIES: phenylalanine--tRNA ligase beta subunit-related protein
W909_RS20960	MULTISPECIES: pheST operon leader peptide PheM
W909_RS17260	MULTISPECIES: poly(3-hydroxyalkanoate) depolymerase
W909_RS17275	MULTISPECIES: polyketide synthase
W909_RS20750	MULTISPECIES: protein MgtS
W909_RS00870	MULTISPECIES: PTS transporter subunit EIIC
W909_RS10165	MULTISPECIES: putative holin
W909_RS16805	MULTISPECIES: radical SAM protein
W909_RS10095	MULTISPECIES: regulatory protein GemA
W909_RS14070	MULTISPECIES: response regulator
W909_RS02065	MULTISPECIES: ribbon-helix-helix domain-containing protein
W909_RS06510	MULTISPECIES: SDR family NAD(P)-dependent oxidoreductase
W909_RS07065	MULTISPECIES: SDR family NAD(P)-dependent oxidoreductase
W909_RS10275	MULTISPECIES: tail protein X
W909_RS06800	MULTISPECIES: TetR family transcriptional regulator
W909_RS09685	MULTISPECIES: TetR/AcrR family transcriptional regulator
W909_RS10660	MULTISPECIES: TetR/AcrR family transcriptional regulator
W909_RS06515	MULTISPECIES: thioester reductase domain-containing protein
W909_RS03370	MULTISPECIES: TIM barrel protein
W909_RS10170	MULTISPECIES: transglycosylase SLT domain-containing protein
W909_RS02345	MULTISPECIES: TrkH family potassium uptake protein
W909_RS02100	MULTISPECIES: tRNA(fMet)-specific endonuclease VapC
W909_RS13505	MULTISPECIES: tRNA(fMet)-specific endonuclease VapC
W909_RS20265	MULTISPECIES: type II toxin-antitoxin system HicA family toxin
W909_RS08715	MULTISPECIES: type VI secretion system tip protein VgrG
W909_RS03315	MULTISPECIES: tyrosine-type recombinase/integrase
W909_RS03435	MULTISPECIES: UDP-glucose 4-epimerase GalE
W909_RS20845	MULTISPECIES: YnhF family membrane protein
W909_RS13825	MULTISPECIES: YolA family protein
W909_RS07060	MULTISPECIES: YqcI/YcgG family protein
W909_RS06525	non-ribosomal peptide synthetase
W909_RS02090	patatin-like phospholipase family protein
W909_RS07600	PD-(D/E)XK nuclease family protein
W909_RS08705	phage tail protein
W909_RS10270	phage tail protein
W909_RS02005	phospholipase D family protein
W909_RS06860	phosphopantetheine-binding protein
W909_RS17240	phosphopantetheine-binding protein
W909_RS14150	PIN domain-containing protein
W909_RS12700	P-loop NTPase fold protein
W909_RS15875	PRD domain-containing protein
W909_RS14180	P-type conjugative transfer protein TrbJ
W909_RS14190	P-type conjugative transfer protein TrbL
W909_RS03265	recombinase family protein
W909_RS14155	relaxase/mobilization nuclease domain-containing protein
W909_RS15980	restriction endonuclease subunit S
W909_RS07845	reverse transcriptase family protein
W909_RS12720	reverse transcriptase family protein
W909_RS02035	ribbon-helix-helix domain-containing protein
W909_RS17205	SDR family NAD(P)-dependent oxidoreductase
W909_RS17230	SDR family NAD(P)-dependent oxidoreductase
W909_RS19800	SDR family NAD(P)-dependent oxidoreductase
W909_RS02000	site-specific DNA-methyltransferase
W909_RS10350	SymE family type I addiction module toxin
W909_RS18780	tail fiber assembly protein
W909_RS12715	TatD family hydrolase
W909_RS06875	thioesterase domain-containing protein
W909_RS03335	transposase
W909_RS06535	type I polyketide synthase
W909_RS17210	type I polyketide synthase
W909_RS15990	type I restriction endonuclease subunit R
W909_RS15970	type I restriction-modification system subunit M
W909_RS10345	type II toxin-antitoxin system ParD family antitoxin
W909_RS02070	type II toxin-antitoxin system RelE/ParE family toxin
W909_RS07235	type II toxin-antitoxin system RelE/ParE family toxin
W909_RS02105	type IV toxin-antitoxin system AbiEi family antitoxin domain-containing protein
W909_RS02275	type-1Ba cytolytic delta-endotoxin
W909_RS02280	type-2Aa cytolytic delta-endotoxin
W909_RS15975	virulence RhuM family protein
